# Supplementary material for: Tailored design of polyurethane based fouling-tolerant nanofibrous membrane for water treatment
Source: Royal Society of Chemistry journal article supplement (doi:10.1039/c7nj03997b), 2018-01-01
Supplement: c7nj03997b1.pdf [file c7nj03997b1.pdf]

## Tailored designing of Polyurethane based fouling-tolerant nanofibrous membrane for water treatment

Suja P Sundaran,<sup>a</sup> Reshmi C R<sup>a</sup>, and Sujith A<sup>a</sup>

New Journal of Chemistry

### Supporting information

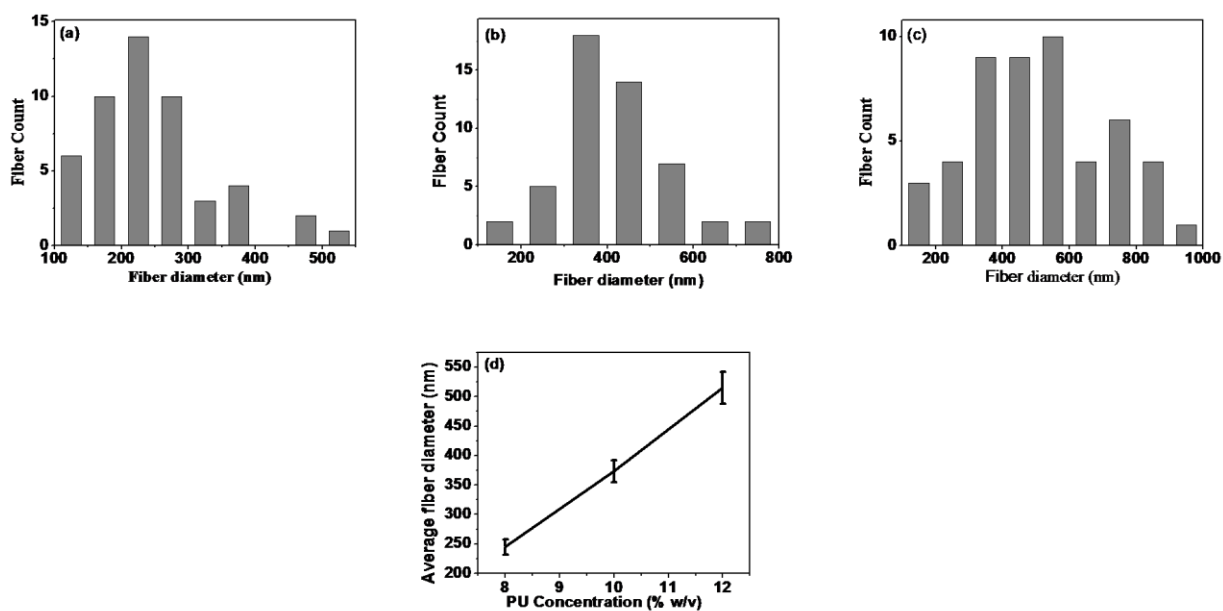

Fig. S1: Diameter histograms of electrospun PU fibers using a 50/50 v/v THF: DMF solvent and various PU Concentrations of (a) 8% w/v, (b) 10% w/v, (c) 12% w/v (d) Average fiber diameter.

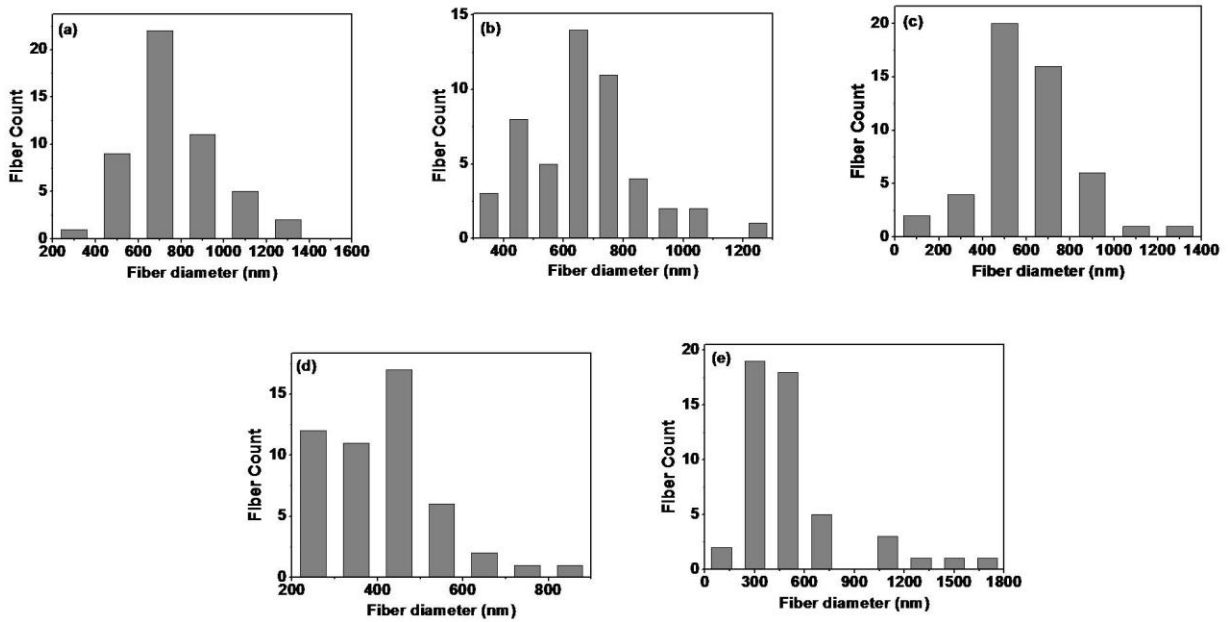

Fig.S2. Diameter Histogram of electrospun PU at 10% w/v and varying DMF:THF v/v ratios (a) 70: 30, (b) 60: 40, (c) 50: 50, (d) 40:60, (e) 30: 70

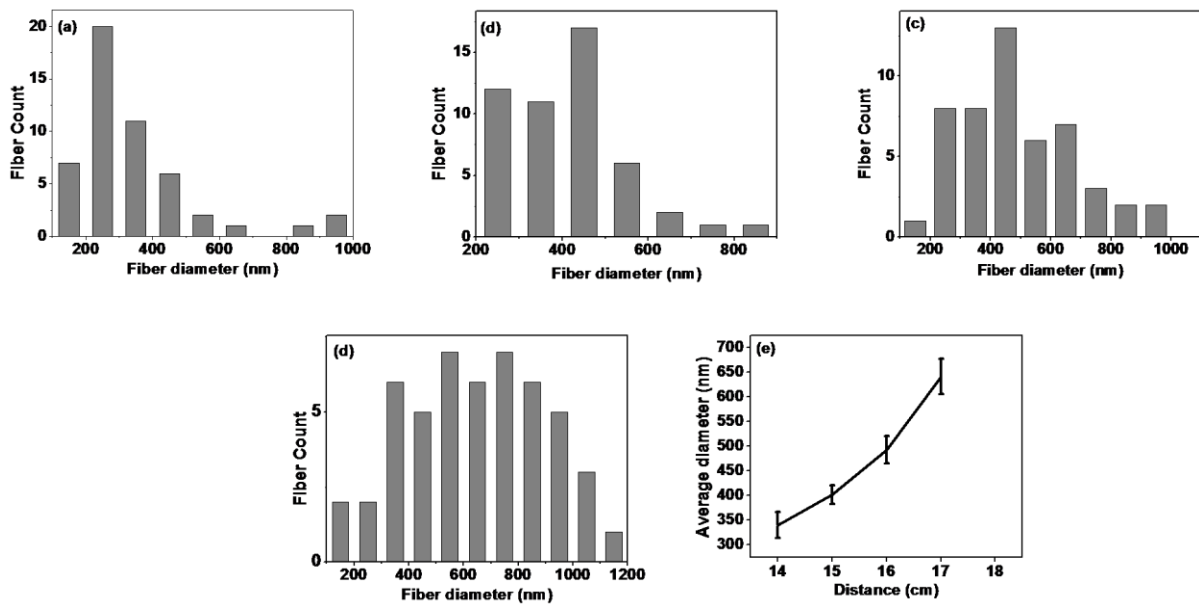

Fig.S3. Diameter Histogram of electrospun PU at applied voltage (a) 14 cm (b) 15 cm (c) 16 cm (d) 17 cm (e) Average fiber diameter.

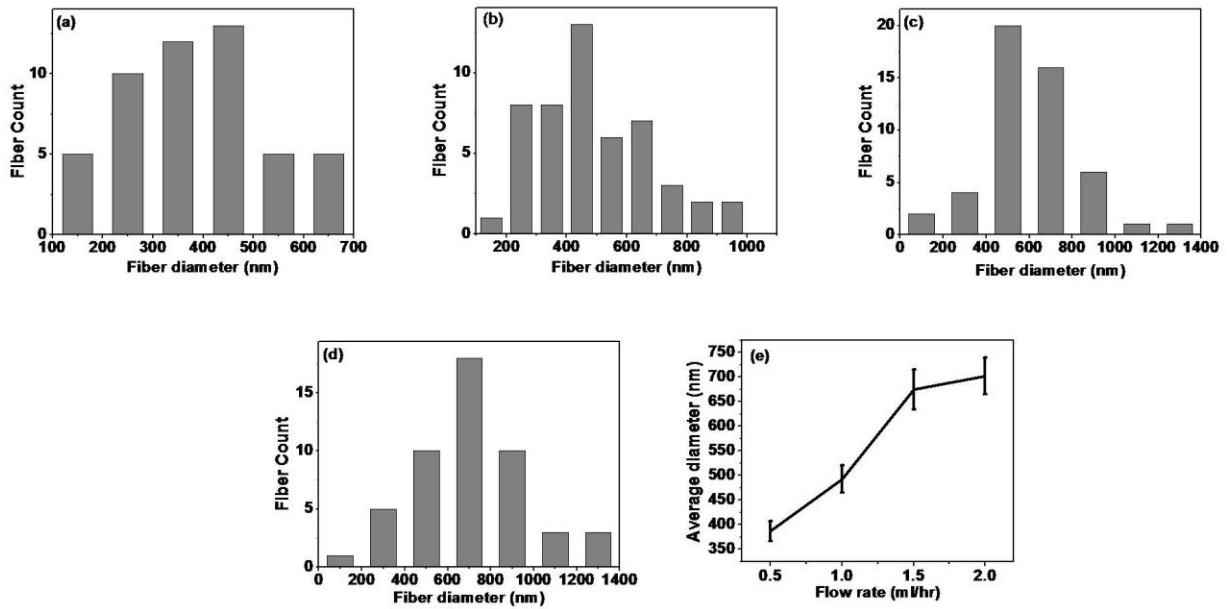

Fig.S4. Diameter Histogram of electrospun PU at applied voltage (a) 0.5 ml/hr, (b) 1 ml/hr, (c) 1.5 ml/hr, (d) 2 ml/hr, (e) Average fiber diameter

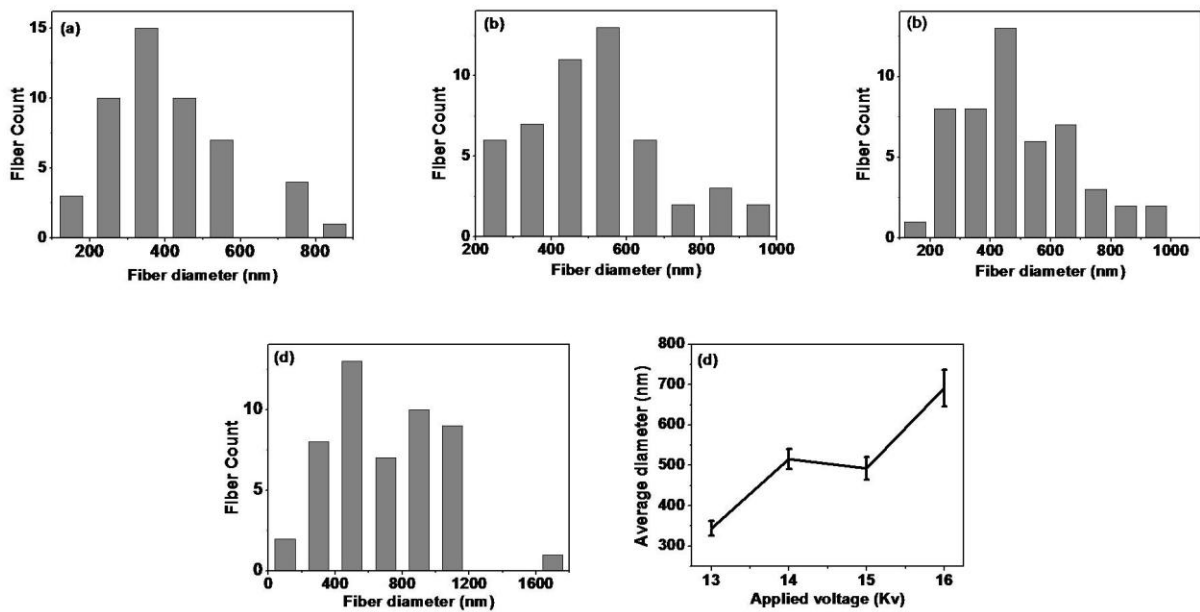

Fig. S5. Diameter histogram of 10% w/v PU electrospun membranes with various applied voltage of (a) 13 Kv, (b) 14 Kv, (c) 15 Kv (d) 16 Kv (e) Average fiber diameter

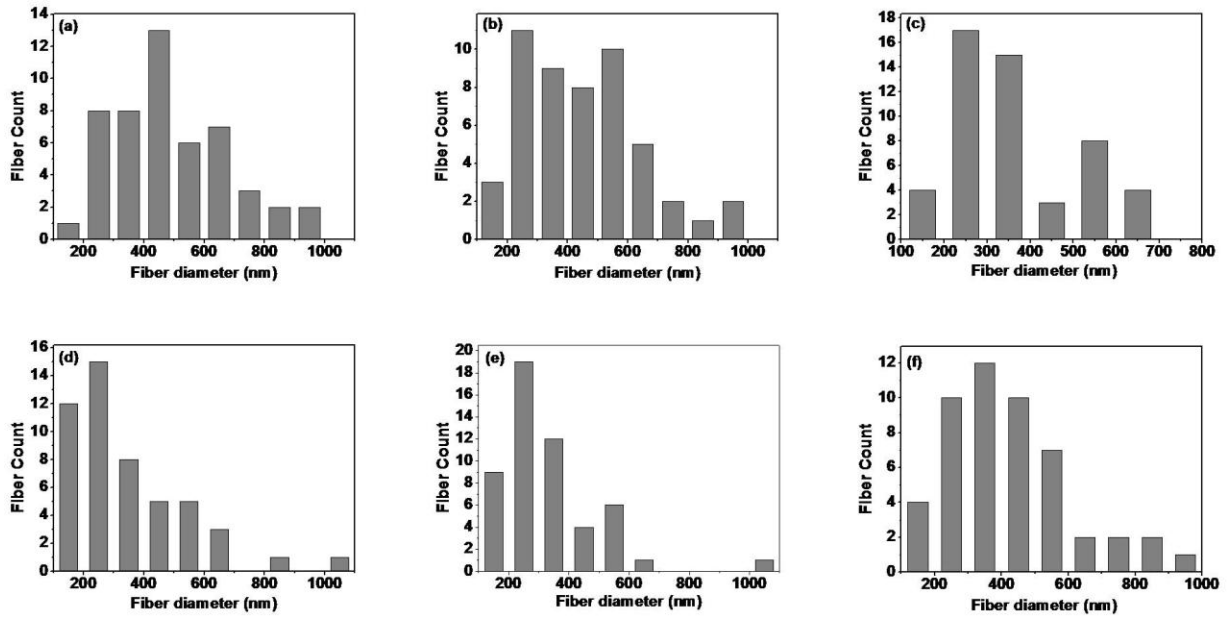

Fig. S6. Diameter histogram of electrospun PU/PVP membrane (a) PU (b) PU/5PVP (c) PU/10 PVP (d) PU/15PVP (e) PU/20PVP (f) PU/25PVP

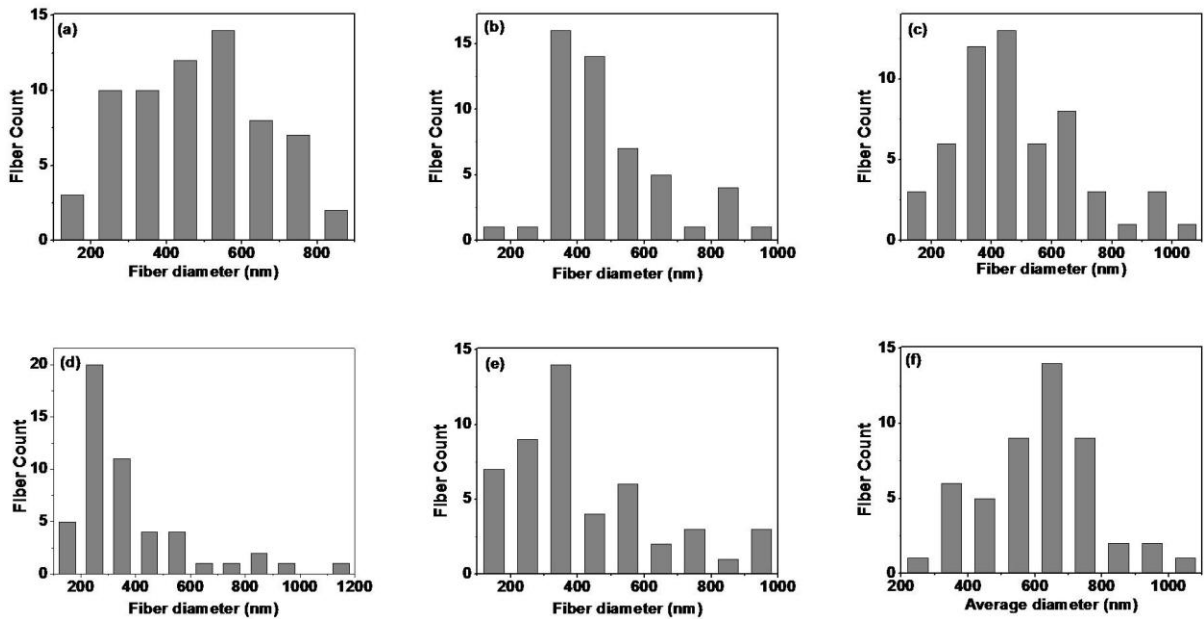

Fig. S7. Fiber diameter histogram of water treated electrospun PU/PVP sample (a) PU/0PVP (b) PU/5PVP (c) PU/10PVP (d) PU/15PVP (e) PU/20PVP (f) PU/25PVP.
